# Supplementary material
Source: ML conference proceedings conference paper supplement (https://proceedings.mlr.press/v70/zhang17f.html)
Supplement: Supplementary file [file zhang17f-supp.pdf]

# Supplementary Materials

## A Inverse polynomial kernel and Gaussian kernel

In this appendix, we describe the properties of the two types of kernels — the inverse polynomial kernel (14) and the Gaussian RBF kernel (15). We prove that the associated reproducing kernel Hilbert Spaces (RKHS) of these kernels contain filters taking the form  $h : z \mapsto \sigma(\langle w, z \rangle)$  for particular activation functions  $\sigma$ .

### A.1 Inverse polynomial kernel

We first verify that the function (14) is a kernel function. This holds since that we can find a mapping  $\varphi : \mathbb{R}^{d_1} \rightarrow \ell^2(\mathbb{N})$  such that  $\mathcal{K}(z, z') = \langle \varphi(z), \varphi(z') \rangle$ . We use  $z_i$  to represent the  $i$ -th coordinate of an infinite-dimensional vector  $z$ . The  $(k_1, \dots, k_j)$ -th coordinate of  $\varphi(z)$ , where  $j \in \mathbb{N}$  and  $k_1, \dots, k_j \in [d_1]$ , is defined as  $2^{-\frac{j+1}{2}} x_{k_1} \dots x_{k_j}$ . By this definition, we have

$$\langle \varphi(x), \varphi(y) \rangle = \sum_{j=0}^{\infty} 2^{-(j+1)} \sum_{(k_1, \dots, k_j) \in [d_1]^j} z_{k_1} \dots z_{k_j} z'_{k_1} \dots z'_{k_j}. \quad (21)$$

Since  $\|z\|_2 \leq 1$  and  $\|z'\|_2 \leq 1$ , the series on the right-hand side is absolutely convergent. The inner term on the right-hand side of equation (21) can be simplified to

$$\sum_{(k_1, \dots, k_j) \in [d_1]^j} z_{k_1} \dots z_{k_j} z'_{k_1} \dots z'_{k_j} = (\langle z, z' \rangle)^j. \quad (22)$$

Combining equations (21) and (22) and using the fact that  $|\langle z, z' \rangle| \leq 1$ , we have

$$\langle \varphi(z), \varphi(z') \rangle = \sum_{j=0}^{\infty} 2^{-(j+1)} (\langle z, z' \rangle)^j \stackrel{(i)}{=} \frac{1}{2 - \langle z, z' \rangle} = \mathcal{K}(z, z'),$$

which verifies that  $\mathcal{K}$  is a kernel function and  $\varphi$  is the associated feature map. Next, we prove that the associated RKHS contains the class of nonlinear filters. The lemma was proved by Zhang et al. [2]. We include the proof to make the paper self-contained.

**Lemma 1.** *Assume that the function  $\sigma(x)$  has a polynomial expansion  $\sigma(t) = \sum_{j=0}^{\infty} a_j t^j$ . Let  $C_\sigma(\lambda) := \sqrt{\sum_{j=0}^{\infty} 2^{j+1} a_j^2 \lambda^{2j}}$ . If  $C_\sigma(\|w\|_2) < \infty$ , then the RKHS induced by the inverse polynomial kernel contains function  $h : z \mapsto \sigma(\langle w, z \rangle)$  with Hilbert norm  $\|h\|_{\mathcal{H}} = C_\sigma(\|w\|_2)$ .*

*Proof.* Let  $\varphi$  be the feature map that we have defined for the polynomial inverse kernel. We define vector  $\bar{w} \in \ell^2(\mathbb{N})$  as follow: the  $(k_1, \dots, k_j)$ -th coordinate of  $\bar{w}$ , where  $j \in \mathbb{N}$  and  $k_1, \dots, k_j \in [d_1]$ , is equal to  $2^{\frac{j+1}{2}} a_j w_{k_1} \dots w_{k_j}$ . By this definition, we have

$$\sigma(\langle w, z \rangle) = \sum_{t=0}^{\infty} a_j (\langle w, z \rangle)^j = \sum_{j=0}^{\infty} a_j \sum_{(k_1, \dots, k_j) \in [d_1]^j} w_{k_1} \dots w_{k_j} z_{k_1} \dots z_{k_j} = \langle \bar{w}, \varphi(z) \rangle, \quad (23)$$

where the first equation holds since  $\sigma(x)$  has a polynomial expansion  $\sigma(x) = \sum_{j=0}^{\infty} a_j x^j$ , the second by expanding the inner product, and the third by definition of  $\bar{w}$  and  $\varphi(z)$ . The  $\ell_2$ -norm of  $\bar{w}$  is equal to:

$$\|\bar{w}\|_2^2 = \sum_{j=0}^{\infty} 2^{j+1} a_j^2 \sum_{(k_1, \dots, k_j) \in [d_1]^j} \bar{w}_{k_1}^2 \bar{w}_{k_2}^2 \dots \bar{w}_{k_j}^2 = \sum_{j=0}^{\infty} 2^{j+1} a_j^2 \|\bar{w}\|_2^{2j} = C_\sigma^2(\|\bar{w}\|_2) < \infty. \quad (24)$$

By the basic property of the RKHS, the Hilbert norm of  $h$  is equal to the  $\ell_2$ -norm of  $\bar{w}$ . Combining equations (23) and (24), we conclude that  $h \in \mathcal{H}$  and  $\|h\|_{\mathcal{H}} = \|\bar{w}\|_2 = C_\sigma(\|\bar{w}\|_2)$ .  $\square$

According to Lemma 1, it suffices to upper bound  $C_\sigma(\lambda)$  for a particular activation function  $\sigma$ . To make  $C_\sigma(\lambda) < \infty$ , the coefficients  $\{a_j\}_{j=0}^{\infty}$  must quickly converge to zero, meaning that the activation function must be sufficiently smooth. For polynomial functions of degree  $\ell$ , the definition of  $C_\sigma$  implies that  $C_\sigma(\lambda) = \mathcal{O}(\lambda^\ell)$ . For the sinusoid activation  $\sigma(t) := \sin(t)$ , we have

$$C_\sigma(\lambda) = \sqrt{\sum_{j=0}^{\infty} \frac{2^{2j+2}}{((2j+1)!)^2} \cdot (\lambda^2)^{2j+1}} \leq 2e^{\lambda^2}.$$

For the erf function and the smoothed hinge loss function defined in Section 3.4, Zhang et al. [2, Proposition 1] proved that  $C_\sigma(\lambda) = \mathcal{O}(e^{c\lambda^2})$  for universal numerical constant  $c > 0$ .

## A.2 Gaussian kernel

The Gaussian kernel also induces an RKHS that contains a particular class of nonlinear filters. The proof is similar to that of Lemma 1.

**Lemma 2.** *Assume that the function  $\sigma(x)$  has a polynomial expansion  $\sigma(t) = \sum_{j=0}^{\infty} a_j t^j$ . Let  $C_\sigma(\lambda) := \sqrt{\sum_{j=0}^{\infty} \frac{j! e^{2\gamma}}{(2\gamma)^j} a_j^2 \lambda^{2j}}$ . If  $C_\sigma(\|w\|_2) < \infty$ , then the RKHS induced by the Gaussian kernel contains the function  $h : z \mapsto \sigma(\langle w, z \rangle)$  with Hilbert norm  $\|h\|_{\mathcal{H}} = C_\sigma(\|w\|_2)$ .*

*Proof.* When  $\|z\|_2 = \|z'\|_2 = 1$ , It is well-known [see, e.g. 1] the following mapping  $\varphi : \mathbb{R}^{d_1} \rightarrow \ell^2(\mathbb{N})$  is a feature map for the Gaussian RBF kernel: the  $(k_1, \dots, k_j)$ -th coordinate of  $\varphi(z)$ , where  $j \in \mathbb{N}$  and  $k_1, \dots, k_j \in [d_1]$ , is defined as  $e^{-\gamma} ((2\gamma)^j / j!)^{1/2} x_{k_1} \dots x_{k_j}$ . Similar to equation (23), we define a vector  $\bar{w} \in \ell^2(\mathbb{N})$  as follow: the  $(k_1, \dots, k_j)$ -th coordinate of  $\bar{w}$ , where  $j \in \mathbb{N}$  and  $k_1, \dots, k_j \in [d_1]$ , is equal to  $e^{\gamma} ((2\gamma)^j / j!)^{-1/2} a_j w_{k_1} \dots w_{k_j}$ . By this definition, we have

$$\sigma(\langle w, z \rangle) = \sum_{t=0}^{\infty} a_j (\langle w, z \rangle)^j = \sum_{j=0}^{\infty} a_j \sum_{(k_1, \dots, k_j) \in [d_1]^j} w_{k_1} \dots w_{k_j} z_{k_1} \dots z_{k_j} = \langle \bar{w}, \varphi(z) \rangle. \quad (25)$$

The  $\ell_2$ -norm of  $\bar{w}$  is equal to:

$$\|\bar{w}\|_2^2 = \sum_{j=0}^{\infty} \frac{j!e^{2\gamma}}{(2\gamma)^j} a_j^2 \sum_{(k_1, \dots, k_j) \in [d_1]^j} \bar{w}_{k_1}^2 \bar{w}_{k_2}^2 \cdots \bar{w}_{k_j}^2 = \sum_{j=0}^{\infty} \frac{j!e^{2\gamma}}{(2\gamma)^j} a_j^2 \|\bar{w}\|_2^{2j} = C_\sigma^2(\|\bar{w}\|_2) < \infty. \quad (26)$$

Combining equations (23) and (24), we conclude that  $h \in \mathcal{H}$  and  $\|h\|_{\mathcal{H}} = \|\bar{w}\|_2 = C_\sigma(\|\bar{w}\|_2)$ .  $\square$

Comparing Lemma 1 and Lemma 2, we find that the Gaussian kernel imposes a stronger condition on the smoothness of the activation function. For polynomial functions of degree  $\ell$ , we still have  $C_\sigma(\lambda) = \mathcal{O}(\lambda^\ell)$ . For the sinusoid activation  $\sigma(t) := \sin(t)$ , it can be verified that

$$C_\sigma(\lambda) = \sqrt{e^{2\gamma} \sum_{j=0}^{\infty} \frac{1}{(2j+1)!} \cdot \left(\frac{\lambda^2}{2\gamma}\right)^{2j+1}} \leq e^{\lambda^2/(4\gamma)+\gamma}.$$

However, the value of  $C_\sigma(\lambda)$  is infinite when  $\sigma$  is the erf function or the smoothed hinge loss, meaning that the Gaussian kernel's RKHS doesn't contain filters activated by these two functions.

## B Convex relaxation for nonlinear activation

In this appendix, we provide a detailed derivation of the relaxation for nonlinear activation functions that we previously sketched in Section 3.2. Recall that the filter output is  $\sigma(\langle w_j, z \rangle)$ . Appendix A shows that given a sufficiently smooth activation function  $\sigma$ , we can find some kernel function  $\mathcal{K} : \mathbb{R}^{d_1} \times \mathbb{R}^{d_1} \rightarrow \mathbb{R}$  and a feature map  $\varphi : \mathbb{R}^{d_1} \rightarrow \ell^2(\mathbb{N})$  satisfying  $\mathcal{K}(z, z') \equiv \langle \varphi(z), \varphi(z') \rangle$ , such that

$$\sigma(\langle w_j, z \rangle) \equiv \langle \bar{w}_j, \varphi(z) \rangle. \quad (27)$$

Here  $\bar{w}_j \in \ell^2(\mathbb{N})$  is a countable-dimensional vector and  $\varphi := (\varphi_1, \varphi_2, \dots)$  is a countable sequence of functions. Moreover, the  $\ell_2$ -norm of  $\bar{w}_j$  is bounded as  $\|\bar{w}_j\|_2 \leq C_\sigma(\|w_j\|_2)$  for a monotonically increasing function  $C_\sigma$  that depends on the kernel (see Lemma 1 and Lemma 2). As a consequence, we may use  $\varphi(z)$  as the vectorized representation of the patch  $z$ , and use  $\bar{w}_j$  as the linear transformation weights, then the problem is reduced to training a CNN with the identity activation function.

The filter is parametrized by an infinite-dimensional vector  $\bar{w}_j$ . Our next step is to reduce the original ERM problem to a finite-dimensional one. In order to minimize the empirical risk, one only needs to concern the output on the training data, that is, the output of  $\langle \bar{w}_j, \varphi(z_p(x_i)) \rangle$  for all  $(i, p) \in [n] \times [P]$ . Let  $T$  be the orthogonal projector onto the linear subspace spanned by the vectors  $\{\varphi(z_p(x_i)) : (i, p) \in [n] \times [P]\}$ . Then we have

$$\forall (i, p) \in [n] \times [P]: \quad \langle \bar{w}_j, \varphi(z_p(x_i)) \rangle = \langle \bar{w}_j, T\varphi(z_p(x_i)) \rangle = \langle T\bar{w}_j, \varphi(z_p(x_i)) \rangle.$$

The last equation follows since the orthogonal projector  $T$  is self-adjoint. Thus, for empirical risk minimization, we can without loss of generality assume that  $\bar{w}_j$  belongs to the linear subspace spanned by  $\{\varphi(z_p(x_i)) : (i, p) \in [n] \times [P]\}$  and reparametrize it by:

$$\bar{w}_j = \sum_{(i,p) \in [n] \times [P]} \beta_{j,(i,p)} \varphi(z_p(x_i)). \quad (28)$$

Let  $\beta_j \in \mathbb{R}^{nP}$  be a vector whose  $(i, p)$ -th coordinate is  $\beta_{j,(i,p)}$ . In order to estimate  $\bar{w}_j$ , it suffices to estimate the vector  $\beta_j$ . By definition, the vector satisfies the relation  $\beta_j^\top K \beta_j = \|\bar{w}_j\|_2^2$ , where  $K$  is the  $nP \times nP$  kernel matrix defined in Section 3.2. As a consequence, if we can find a matrix  $Q$  such that  $QQ^\top = K$ , then we have the norm constraint

$$\|Q^\top \beta_j\|_2 = \sqrt{\beta_j^\top K \beta_j} = \|\bar{w}_j\|_2 \leq C_\sigma(\|w_j\|_2) \leq C_\sigma(B). \quad (29)$$

Let  $v(z) \in \mathbb{R}^{nP}$  be a vector whose  $(i, p)$ -th coordinate is equal to  $\mathcal{K}(z, z_p(x_i))$ . Then by equations (27) and (28), the filter output can be written as

$$\sigma(\langle w_j, z \rangle) \equiv \langle \bar{w}_j, \varphi(z) \rangle \equiv \langle \beta_j, v(z) \rangle. \quad (30)$$

For any patch  $z_p(x_i)$  in the training data, the vector  $v(z_p(x_i))$  belongs to the column space of the kernel matrix  $K$ . Therefore, letting  $Q^\dagger$  represent the pseudo-inverse of matrix  $Q$ , we have

$$\forall (i, p) \in [n] \times [P]: \quad \langle \beta_j, v(z_p(x_i)) \rangle = \beta_j^\top Q Q^\dagger v(z_p(x_i)) = \langle (Q^\top)^\dagger Q^\top \beta_j, v(z_p(x_i)) \rangle.$$

It means that if we replace the vector  $\beta_j$  on the right-hand side of equation (30) by the vector  $(Q^\top)^\dagger Q^\top \beta_j$ , then it won't change the empirical risk. Thus, for ERM we can parametrize the filters by

$$h_j(z) := \langle (Q^\top)^\dagger Q^\top \beta_j, v(z) \rangle = \langle Q^\dagger v(z), Q^\top \beta_j \rangle. \quad (31)$$

Let  $Z(x)$  be an  $P \times nP$  matrix whose  $p$ -th row is equal to  $Q^\dagger v(z_p(x))$ . Similar to the steps in equation (6), we have

$$f_k(x) = \sum_{j=1}^r \alpha_{k,j}^\top Z(x) Q^\top \beta_j = \text{tr} \left( Z(x) \left( \sum_{j=1}^r Q^\top \beta_j \alpha_{k,j}^\top \right) \right) = \text{tr}(Z(x) A_k),$$

where  $A_k := \sum_{j=1}^r Q^\top \beta_j \alpha_{k,j}^\top$ . If we let  $A := (A_1, \dots, A_{d_2})$  denote the concatenation of these matrices, then this larger matrix satisfies the constraints:

**Constraint (C1):**  $\max_{j \in [r]} \|Q^\top \beta_j\|_2 \leq C_\sigma(B_1)$  and  $\max_{(k,j) \in [d_2] \times [r]} \|\alpha_{k,j}\|_2 \leq B_2$ .

**Constraint (C2):** The matrix  $A$  has rank at most  $r$ .

We relax these two constraints to the nuclear norm constraint:

$$\|A\|_* \leq C_\sigma(B_1) B_2 r \sqrt{d_2}. \quad (32)$$

By comparing constraints (8) and (32), we see that the only difference is that the term  $B_1$  in the norm bound has been replaced by  $C_\sigma(B_1)$ . This change is needed because we have used the kernel trick to handle nonlinear activation functions.

## References

- [1] I. Steinwart and A. Christmann. *Support vector machines*. Springer, New York, 2008.
- [2] Y. Zhang, J. D. Lee, and M. I. Jordan.  $\ell_1$ -regularized neural networks are improperly learnable in polynomial time. In *Proceedings on the 33rd International Conference on Machine Learning*, 2016.
